# Supplementary material for: Utilizing herbarium specimens to assist with the listing of rare plants
Source: Frontiers journal article supplement (doi:10.3389/fcosc.2023.1144593), 2023-08-28
Supplement: Table_1.DOCX [file Table_1.DOCX]

Supplementary Material

**Utilizing Herbarium Specimens to Assist with the Listing of Rare Plants**

Brenda Molano-Flores[1*], Sara Johnson[1], Paul Marcum[1], and Mary Ann Feist[2]

*1* - University of Illinois, Illinois Natural History Survey, 1816 South Oak Street, Champaign, IL, 61820, United States

*2* - University of Wisconsin, Wisconsin State Herbarium, Department of Botany, 430 Lincoln Dr., Madison, WI, 53706, United States

*** Correspondence:**Brenda Molano-Flores, molano1@illinois.edu

**Species Distribution Modeling**

*Occurrence Records and Environmental Parameters*

County boundary shapefiles (USCB, 2017 & USCB, 2018) were used to set a study area bounding box and mask for all occurrence records and environmental parameters. The study area was defined within an 8-county boundary for *Macbridea alba* to include Bay, Calhoun, Franklin, Gadsen,Gulf, and Liberty counties. Documented occurrences are found within Bay, Gulf, Franklin, and Liberty counties in the panhandle of Florida (Negron-Ortiz, 2020). For *Physaria thamnophila*, counties with known occurrences, Starr and Zapata counties (USFWS, 2015), were included in addition to neighboring Hidalgo and Webb Counties to define a 4-county study area boundary. Occurrence records for both *Macbridea alba* and *Physaria thamnophila* were obtained from the BIOTICS database through permission of the Florida Natural Areas Inventory (FNAI, 2018) and the Texas National Diversity Database (TXNDD, 2022), respectively. The database consists of element of occurrence records (EORs) which represent groupings of source feature records (SFs) which most often document sub-population records or individual sightings throughout the range of EORs for the species. Shapefile data for each SF record were converted from polygon to point data in ArcGIS Pro version 3.0.2 (ESRI, 2022) and were exported to a file database for each species.

For comparison, coordinate data were also obtained from GBIF (GBIF, 2022a; GBIF, 2022b) including preserved specimens and observations from iNaturalist) and SEINet records for each species (SEINet, 2022). All coordinate data were projected into the WGS84 datum and UTM Zone 16N projection for *Macbridea alba* and UTM Zone 14N projection for *Physaria thamnophila*. Data were rounded to the nearest ten to avoid autocorrelation and maintain one point per grid cell (at a spatial resolution of 10-m grid cell) and duplicates were removed. Presence points totaled 15 records sourced from herbaria and 353 records sourced from BIOTICS for *Macbridea alba* and background points totaled 10012 and 10282 points respectively across models. Presence data records totaled 16 records sourced from herbaria and 98 records sourced from BIOTICS for *Physaria thamnophila* and background points totaled 10012 and 10078 points respectively across models. Three models were created for comparison for each species using either BIOTICS or Herbaria sourced occurrence records, or a combination of both BIOTICS and Herbaria sourced occurrence records. Each model utilized a total of seven environmental parameters. Climate variables, including 30-year averages for precipitation, minimum temperature, maximum temperature, and mean temperature, were resampled from 800m to 10m resolution (PRISM, 2004). Digital elevation models (USGS, 2022) were used to provide elevation and derive slope and aspect with the spatial analyst toolbox functions in ArcGIS Pro (ESRI, 2022).

*Maxent Modeling*

Maxent was selected for use with our presence-only dataset and models were produced with 10,000 background points (Phillips et al., 2006). Default settings were retained (regularization multiplier of 1, auto features) and each model was run with 5 cross-validations to produce a model average as a logistic output (Philips & Dudík, 2008). A model average of the 5 cross-validation runs for each dataset was used as the final model output for processing and analysis in ArcGIS Pro (ESRI, 2022). Suitability ranging from 0 to 1 was reclassified into 5 classes in intervals of 0.2 to compare the area of predicted suitability across models. A modeled prediction of 0.6 or greater was used as a conservative cutoff for predicted distribution whereas sites over a suitability of 0.6 were considered “suitable”.  Area in km2 was calculated for each class using the calculate geometry tool in the field editor of each reclassified layer’s attribute table.

**Literature Cited**

ESRI, Inc. (2022). ArcGIS Desktop: v3.0.2. Redlands, CA: Environmental Systems Research Institute.

Florida Natural Areas Inventory (FNAI). (2018). *Macbridea alba* element of occurrence spatial data. Tallahassee, FL.

GBIF. (2022a). Occurrence Download (*Physaria thamnophila)* https://doi.org/10.15468/dl.d6aebw. GBIF.org (27 May 2022)

GBIF. (2002b). Occurrence Download (*Macbridea alba)* https://doi.org/10.15468/dl.ew9y8w. GBIF.org (27 May 2022)

Negron-Ortiz, V. (2020). *Macbridea alba* (White birds-in-a-nest) 5-year review: summary and evaluation. USFWS Technical Report.

Phillips, S.J., Anderson, R.P. & Schapire, R.E. (2006) Maximum entropy modeling of species geographic distributions. *Ecological Modelling*, 190, 231–259. https://doi.org/10.1016/j.ecolmodel.2005.03.026

Phillips, S. J., & Dudík, M. (2008). Modeling of species distributions with Maxent: new extensions and a comprehensive evaluation. *Ecography*, 31(2), 161-175. https://doi.org/10.1111/j.0906-7590.2008.5203.x

PRISM Climate Group (2004). 30-year normals 800m. Oregon State University, Accessed 2018 via http://prism.oregonstate.edu.

SEINet Portal Network. (2022). http//:www.swbiodiversity.org/seinet/index.php. Accessed on 27 May 2022.

Texas Natural Diversity Database (TXNDD). (2022). *Physaria thamnophila* element of occurrence spatial data. Austin, TX.

United States Census Bureau (USCB). (2017). TIGER/Line shapefile Florida county boundaries, 2017. Accessed 2018 via the Florida Geographic Data Library. www.fgdl.org/download/index.htm

United States Census Bureau (USCB). (2018). TIGER/Line shapefile Texas county boundaries, 2018. Accessed 2021 via the Texas Open Data Portal. https://data.texas.gov/dataset/Texas-Counties-Map/

U.S. Fish and Wildlife Service (2015). *Physaria thamnophila* 5-year review: summary and evaluation. USFWS Technical Report.

U.S. Geological Survey (2022) 3D Elevation Program 1-Meter Resolution Digital Elevation Model (published 20200606), accessed September 21, 2022 at URL <https://www.usgs.gov/the-national-map-data-delivery>
